# Supplementary material for: Jelly Fig (Ficus awkeotsang Makino) Exhibits Antioxidative and Anti-Inflammatory Activities by Regulating Reactive Oxygen Species Production via NFκB Signaling Pathway
Source: MDPI journal article supplement (doi:10.3390/antiox11050981), 2022-05-17
Supplement: s1 [file s1]

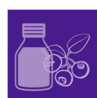

# Supplementary Materials: Jelly Fig (*Ficus awkeotsang* Makino) Extract Exhibits Antioxidative and Anti-Inflammatory Activities by Regulating Reactive Oxygen Species Production via NF $\kappa$ B Signaling Pathway

Meng-Jin Lin , Ping Lin , Kuo-Ching Wen , Hsiu-Mei Chiang and Mei-Chun Lu

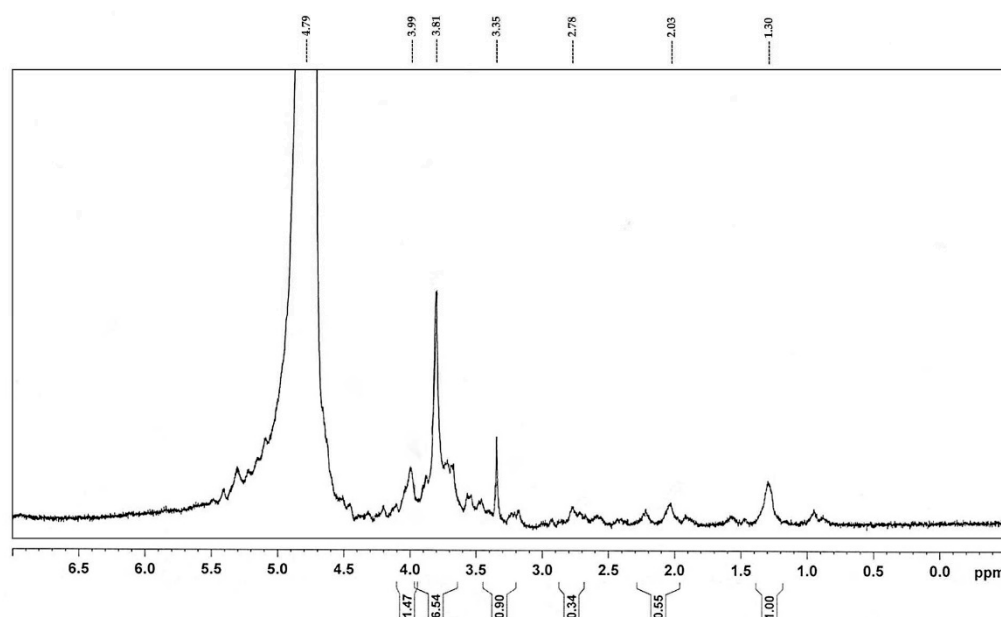

**Figure S1.** Analysis of chemical constituents of the *Ficus awkeotsang* Makino extract by Nuclear magnetic resonance spectroscopy (NMR) spectrum.
